# Supplementary material for: Unique genetic signatures of local adaptation over space and time for diapause, an ecologically relevant complex trait, in Drosophila melanogaster
Source: PubMed Central journal article supplement (PMC7717581; doi:10.1371/journal.pgen.1009110), 2020-11-20

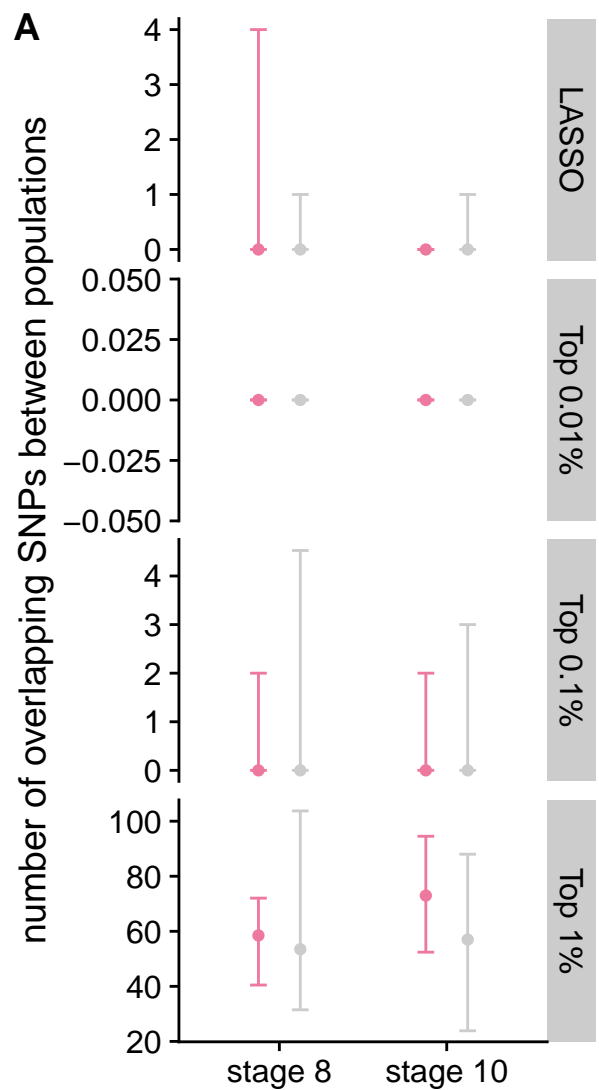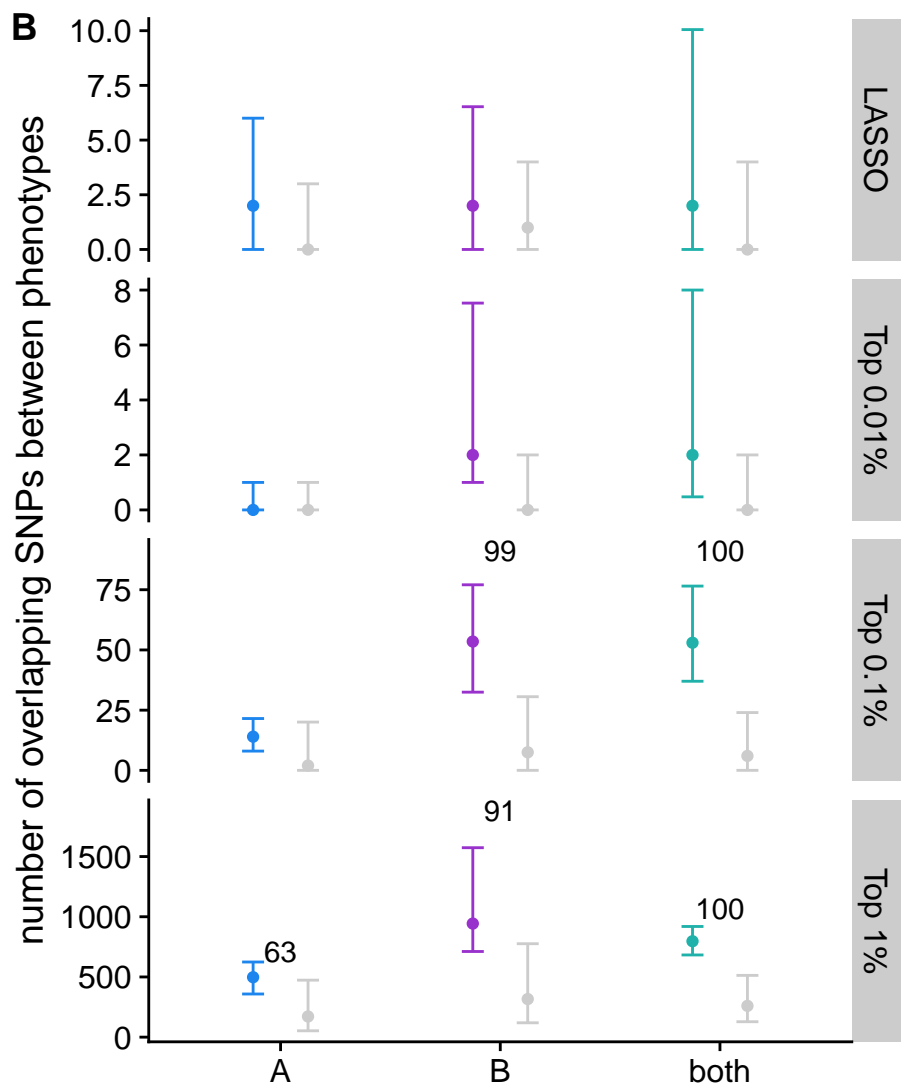

Supplement: pgen.1009110.s010.pdf [file pgen.1009110.s010.pdf]
