# Supplementary material for: Unique genetic signatures of local adaptation over space and time for diapause, an ecologically relevant complex trait, in Drosophila melanogaster
Source: PubMed Central journal article supplement (PMC7717581; doi:10.1371/journal.pgen.1009110), 2020-11-20

Proportion of correctly reconstructed genotypes

0.99999  
0.99990  
0.99900  
0.99000  
0.90000

Pop. A gen. 4

Pop. A gen. 5

Pop. B gen. 4

Pop. B gen. 5

Simulated Population and Generation

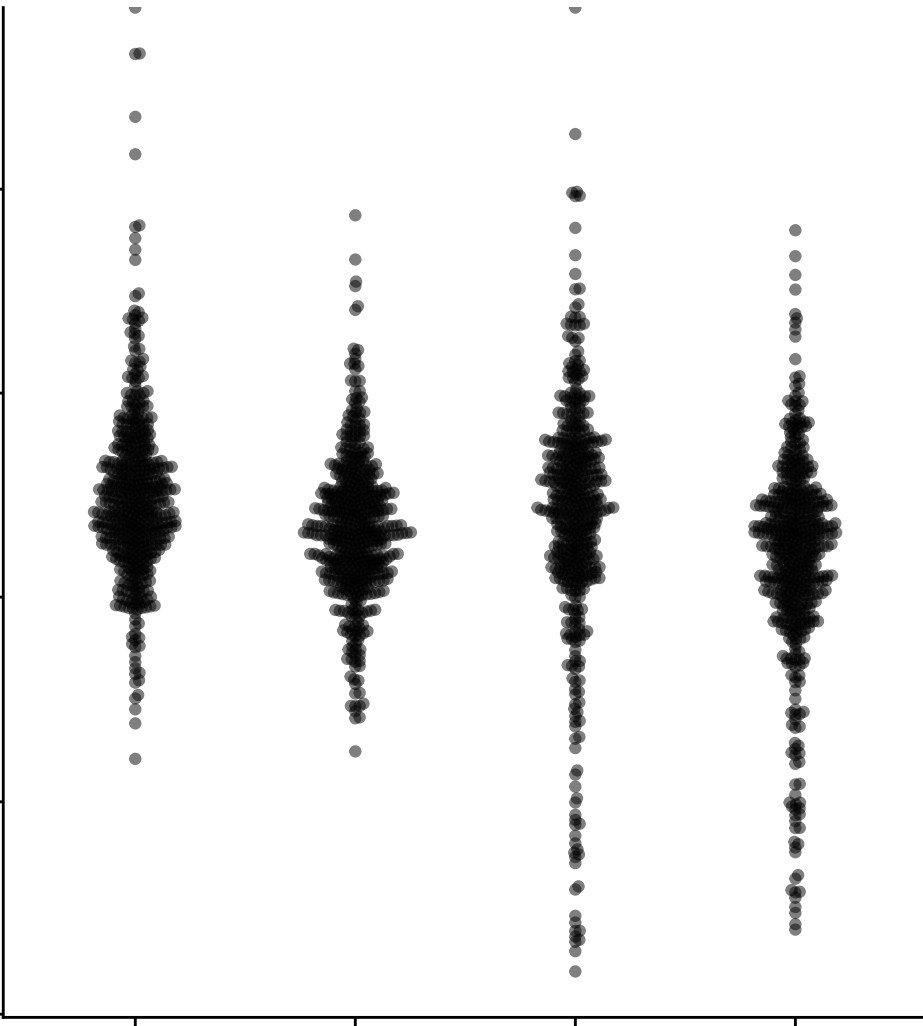

Supplement: pgen.1009110.s022.pdf [file pgen.1009110.s022.pdf]
