# Supplementary material for: Unique genetic signatures of local adaptation over space and time for diapause, an ecologically relevant complex trait, in Drosophila melanogaster
Source: PubMed Central journal article supplement (PMC7717581; doi:10.1371/journal.pgen.1009110), 2020-11-20
Supplement: pgen.1009110.s027.pdf [file pgen.1009110.s027.pdf]

| <b>Annotation</b>   | <b>Population</b> | <b>phenotype</b> | <b>Top 1%</b> | <b>Top 0.1%</b> | <b>Top 0.01%</b> | <b>LASSO</b> |
|---------------------|-------------------|------------------|---------------|-----------------|------------------|--------------|
| UTR                 | A                 | stage 8          | 6.3%          | 6.5%            | 10.1%            | 6.2%         |
|                     | A                 | stage 10         | 6.4%          | 6.3%            | 2.6%             | 7.6%         |
|                     | B                 | stage 8          | 6.7%          | 7.6%            | 11.5%            | 5.0%         |
|                     | B                 | stage 10         | 6.2%          | 5.2%            | 2.6%             | 5.1%         |
|                     | both              | stage 8          | 6.4%          | 6.6%            | 10.5%            | 5.9%         |
|                     | both              | stage 10         | 6.2%          | 5.2%            | 3.9%             | 4.6%         |
| intergenic          | A                 | stage 8          | 11.2%         | 11.8%           | 3.8%             | 10.4%        |
|                     | A                 | stage 10         | 10.3%         | 10.9%           | 13.9%            | 9.8%         |
|                     | B                 | stage 8          | 11.2%         | 11.0%           | 10.3%            | 11.4%        |
|                     | B                 | stage 10         | 11.4%         | 8.9%            | 5.1%             | 9.4%         |
|                     | both              | stage 8          | 10.0%         | 7.0%            | 3.9%             | 9.8%         |
|                     | both              | stage 10         | 10.8%         | 8.4%            | 3.3%             | 7.2%         |
| intronic            | A                 | stage 8          | 25.4%         | 24.2%           | 12.7%            | 23.7%        |
|                     | A                 | stage 10         | 24.6%         | 24.0%           | 34.6%            | 23.1%        |
|                     | B                 | stage 8          | 23.4%         | 24.3%           | 22.8%            | 25.3%        |
|                     | B                 | stage 10         | 27.2%         | 31.7%           | 36.2%            | 24.8%        |
|                     | both              | stage 8          | 25.2%         | 24.6%           | 17.3%            | 27.2%        |
|                     | both              | stage 10         | 25.7%         | 30.2%           | 35.3%            | 31.4%        |
| non-synonymous      | A                 | stage 8          | 4.3%          | 3.7%            | 0.0%             | 3.5%         |
|                     | A                 | stage 10         | 4.2%          | 3.8%            | 1.3%             | 3.1%         |
|                     | B                 | stage 8          | 4.3%          | 4.2%            | 5.1%             | 3.1%         |
|                     | B                 | stage 10         | 3.9%          | 3.0%            | 3.8%             | 3.7%         |
|                     | both              | stage 8          | 3.9%          | 3.5%            | 3.9%             | 3.3%         |
|                     | both              | stage 10         | 3.7%          | 3.2%            | 2.7%             | 3.0%         |
| synonymous          | A                 | stage 8          | 11.0%         | 10.5%           | 11.5%            | 12.8%        |
|                     | A                 | stage 10         | 11.6%         | 11.9%           | 7.6%             | 13.1%        |
|                     | B                 | stage 8          | 10.1%         | 10.0%           | 8.9%             | 12.1%        |
|                     | B                 | stage 10         | 8.6%          | 7.4%            | 7.7%             | 9.7%         |
|                     | both              | stage 8          | 10.6%         | 10.0%           | 9.3%             | 10.9%        |
|                     | both              | stage 10         | 10.2%         | 8.7%            | 5.3%             | 10.5%        |
| upstream/downstream | A                 | stage 8          | 41.6%         | 42.8%           | 60.3%            | 42.4%        |
|                     | A                 | stage 10         | 42.7%         | 42.9%           | 39.1%            | 43.3%        |
|                     | B                 | stage 8          | 44.2%         | 42.9%           | 42.3%            | 42.7%        |
|                     | B                 | stage 10         | 42.6%         | 43.2%           | 43.9%            | 46.7%        |
|                     | both              | stage 8          | 43.8%         | 48.2%           | 54.2%            | 42.7%        |
|                     | both              | stage 10         | 43.2%         | 44.3%           | 48.7%            | 43.1%        |
