# Supplementary material for: Unique genetic signatures of local adaptation over space and time for diapause, an ecologically relevant complex trait, in Drosophila melanogaster
Source: PubMed Central journal article supplement (PMC7717581; doi:10.1371/journal.pgen.1009110), 2020-11-20
Supplement: pgen.1009110.s028.pdf [file pgen.1009110.s028.pdf]

| Annotation          | Population | phenotype | Top 1%       | Top 0.1% | Top 0.01%   | LASSO |
|---------------------|------------|-----------|--------------|----------|-------------|-------|
| UTR                 | A          | stage 8   | 0.55         | 0.66     | 0.94        | 0.59  |
|                     | A          | stage 10  | 0.68         | 0.55     | 0.23        | 0.74  |
|                     | B          | stage 8   | 0.9          | 0.89     | <b>0.96</b> | 0.26  |
|                     | B          | stage 10  | 0.52         | 0.28     | 0.26        | 0.4   |
|                     | both       | stage 8   | 0.767        | 0.687    | 0.897       | 0.467 |
|                     | both       | stage 10  | 0.533        | 0.214    | 0.282       | 0.297 |
| intergenic          | A          | stage 8   | 0.69         | 0.75     | 0.09        | 0.46  |
|                     | A          | stage 10  | 0.3          | 0.52     | 0.73        | 0.54  |
|                     | B          | stage 8   | 0.69         | 0.59     | 0.59        | 0.59  |
|                     | B          | stage 10  | 0.77         | 0.24     | 0.23        | 0.32  |
|                     | both       | stage 8   | 0.224        | 0.041    | 0.104       | 0.321 |
|                     | both       | stage 10  | 0.505        | 0.147    | 0.062       | 0.155 |
| intronic            | A          | stage 8   | 0.78         | 0.51     | 0.1         | 0.36  |
|                     | A          | stage 10  | 0.57         | 0.5      | 0.89        | 0.33  |
|                     | B          | stage 8   | 0.22         | 0.48     | 0.44        | 0.56  |
|                     | B          | stage 10  | 0.97         | 0.97     | 0.87        | 0.43  |
|                     | both       | stage 8   | 0.706        | 0.515    | 0.203       | 0.747 |
|                     | both       | stage 10  | 0.832        | 0.963    | 0.905       | 0.9   |
| non-synonymous      | A          | stage 8   | 0.6          | 0.38     | 0.04        | 0.55  |
|                     | A          | stage 10  | 0.5          | 0.33     | 0.23        | 0.31  |
|                     | B          | stage 8   | 0.84         | 0.59     | 0.79        | 0.38  |
|                     | B          | stage 10  | 0.23         | 0.15     | 0.59        | 0.44  |
|                     | both       | stage 8   | 0.403        | 0.331    | 0.582       | 0.378 |
|                     | both       | stage 10  | 0.244        | 0.193    | 0.453       | 0.367 |
| synonymous          | A          | stage 8   | 0.18         | 0.31     | 0.59        | 0.69  |
|                     | A          | stage 10  | 0.61         | 0.62     | 0.29        | 0.6   |
|                     | B          | stage 8   | 0.08         | 0.17     | 0.3         | 0.57  |
|                     | B          | stage 10  | <b>0</b>     | <b>0</b> | 0.32        | 0.35  |
|                     | both       | stage 8   | 0.083        | 0.205    | 0.415       | 0.376 |
|                     | both       | stage 10  | <b>0.019</b> | 0.043    | 0.072       | 0.396 |
| upstream/downstream | A          | stage 8   | 0.1          | 0.48     | <b>0.98</b> | 0.52  |
|                     | A          | stage 10  | 0.47         | 0.47     | 0.36        | 0.6   |
|                     | B          | stage 8   | 0.84         | 0.46     | 0.44        | 0.58  |
|                     | B          | stage 10  | 0.4          | 0.61     | 0.52        | 0.83  |
|                     | both       | stage 8   | 0.811        | 0.954    | 0.904       | 0.529 |
|                     | both       | stage 10  | 0.632        | 0.706    | 0.786       | 0.552 |
